# Supplementary material
Source: publisher figshare collection journal article supplement (https://acs.figshare.com/ndownloader/files/14181587)
Supplement: Supplementary file 1 [file 14181587]

## Supporting Information

### **High-Rate and Long-Life Sodium-Ion Batteries Based on Sponge-Like 3D Porous Na-Rich Ferric Pyrophosphate Cathode Material**

Renming Zhan<sup>a,b</sup>, Youquan Zhang<sup>a,b</sup>, Hao Chen<sup>a,b</sup>, Qiuju Xu<sup>a,b</sup>, Qianru Ma<sup>a,b</sup>, Wei Gao<sup>a,b</sup>, Tingting Yang<sup>a,b</sup>, Jian Jiang<sup>a,b</sup>, Shujuan Bao<sup>a,b,\*</sup>, Maowen Xu<sup>a,b,\*</sup>

<sup>a</sup> Institute for Clean Energy and Advanced Materials, Faculty of Materials and Energy, Southwest University, Chongqing 400715, P. R. China.

<sup>b</sup> Chongqing Key Laboratory for Advanced Materials and Technologies of Clean Energies, Chongqing 400715, P. R. China.

\* Corresponding author. E-mail: [baoshj@swu.edu.cn](mailto:baoshj@swu.edu.cn); [xumaowen@swu.edu.cn](mailto:xumaowen@swu.edu.cn)

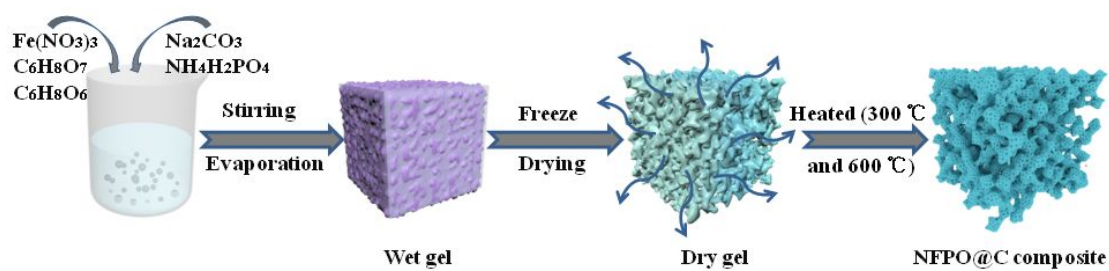

**Figure S1.** Schematic illustration of the formation mechanism of sponge-like NFPO@SC nano-particles.

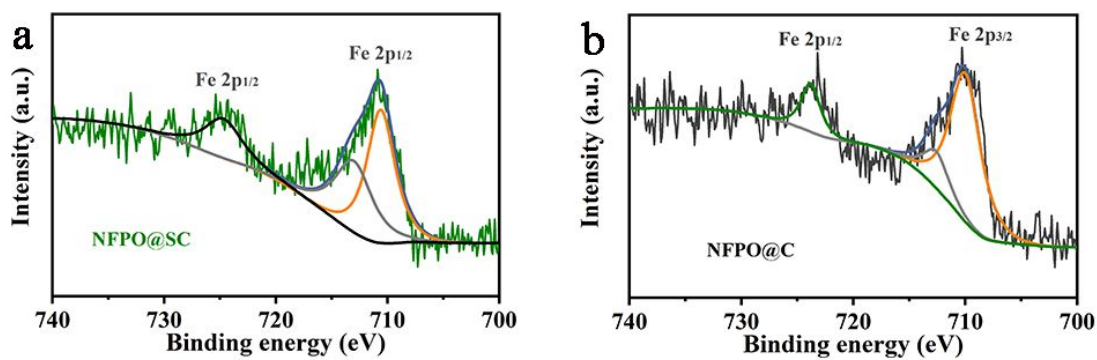

**Figure S2.** XPS narrow spectra of Fe 2p for NFPO@SC (a) and NFPO@C (b).

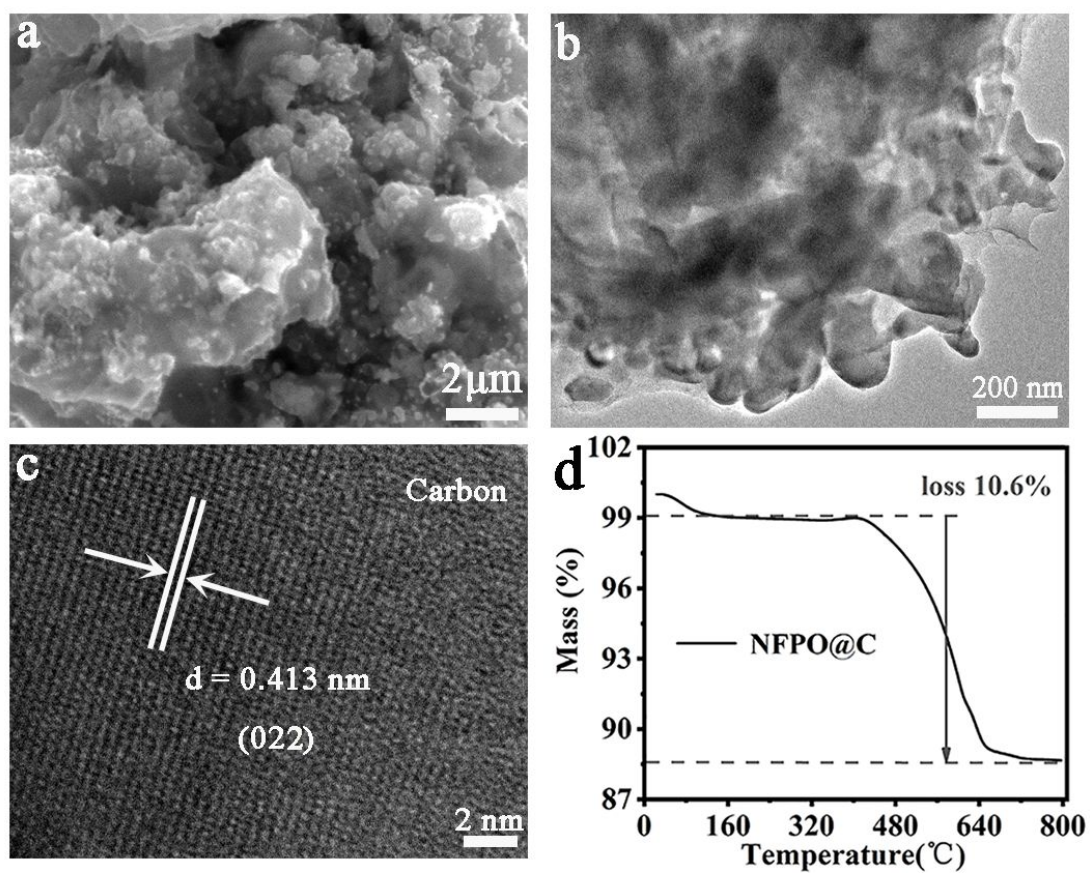

**Figure S3.** (a) SEM image of NFPO@C at low resolution; (b) TEM image of NFPO@C at low resolution; (c) TEM image of NFPO@C at high resolution; (d) Carbon content of NFPO@C analyzed by thermogravimetric (TGA) measurements.

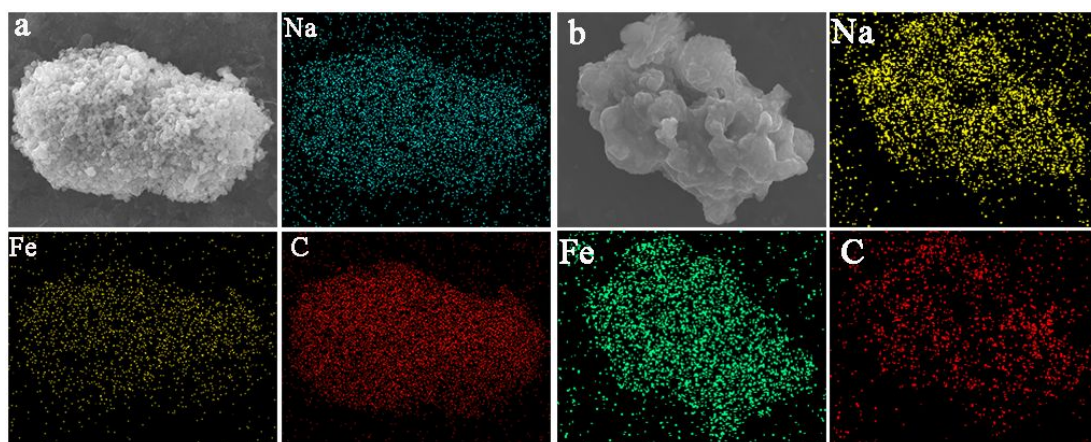

**Figure S4.** EDS images of NFPO@SC and NFPO@C (a, b).

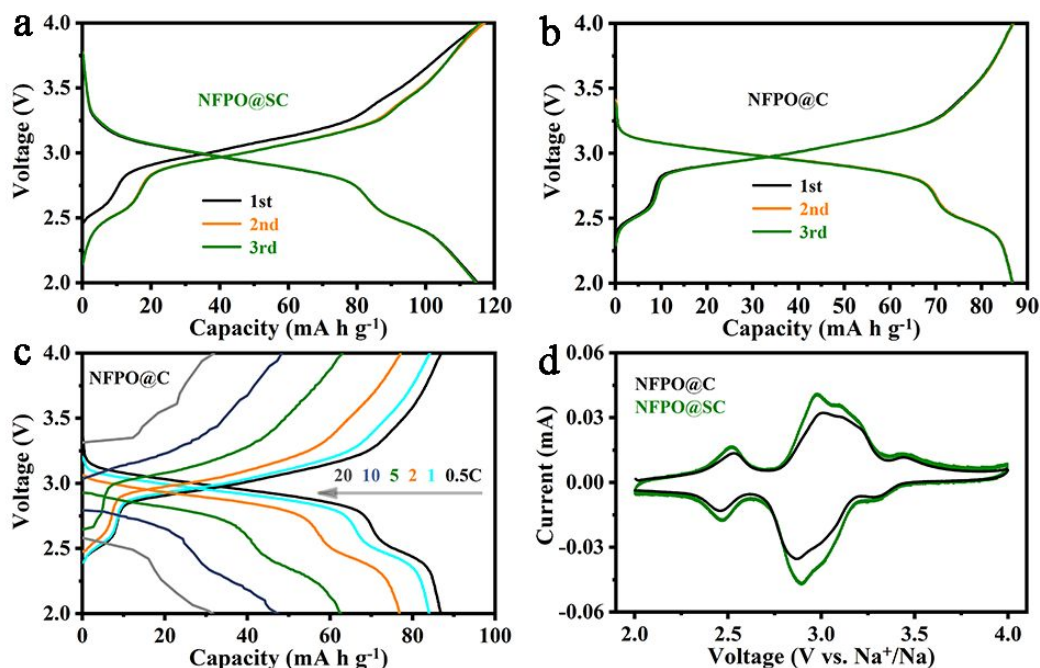

**Figure S5.** (a and b) Voltage vs. specific capacity profiles (first to third cycles) of NFPO@SC and NFPO@C, respectively; (c) Charge-discharge profiles of NFPO@C at different C-rates; (d) Cyclic voltammograms (CV) of NFPO@C and NFPO@SC.

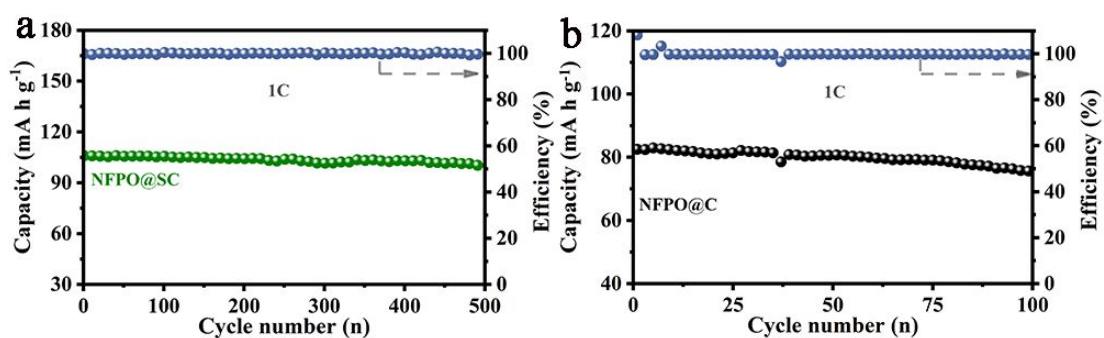

**Figure S6.** (a, b) Cycling stability and corresponding Coulombic efficiency of NFPO@SC electrode and NFPO@C at 1 C, respectively.



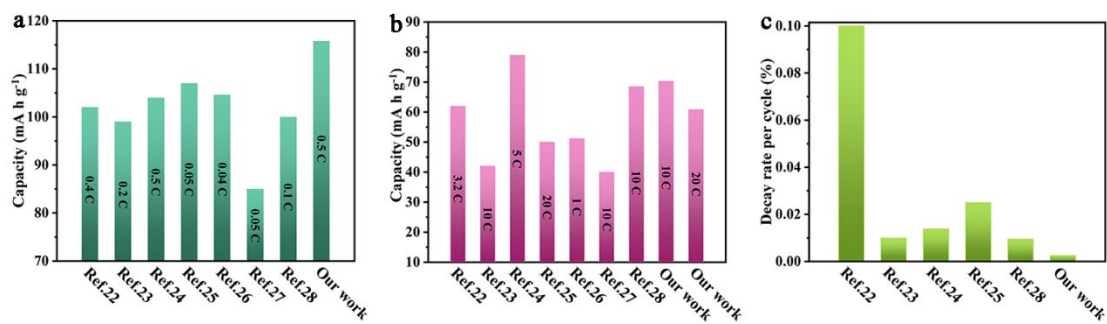

**Figure S7.** Comparisons of performance with others ferric sodium pyrophosphate electrodes (a) at low rate, (b) at high rate, (c) decay rate per cycle.

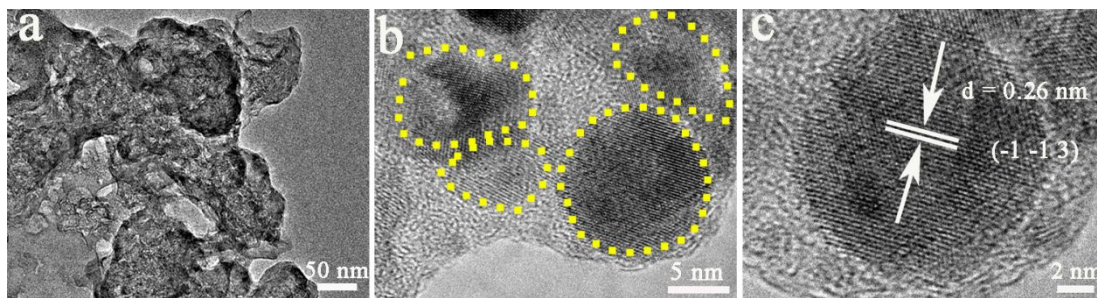

**Figure S8.** Morphology of NFPO@SC after circulation.

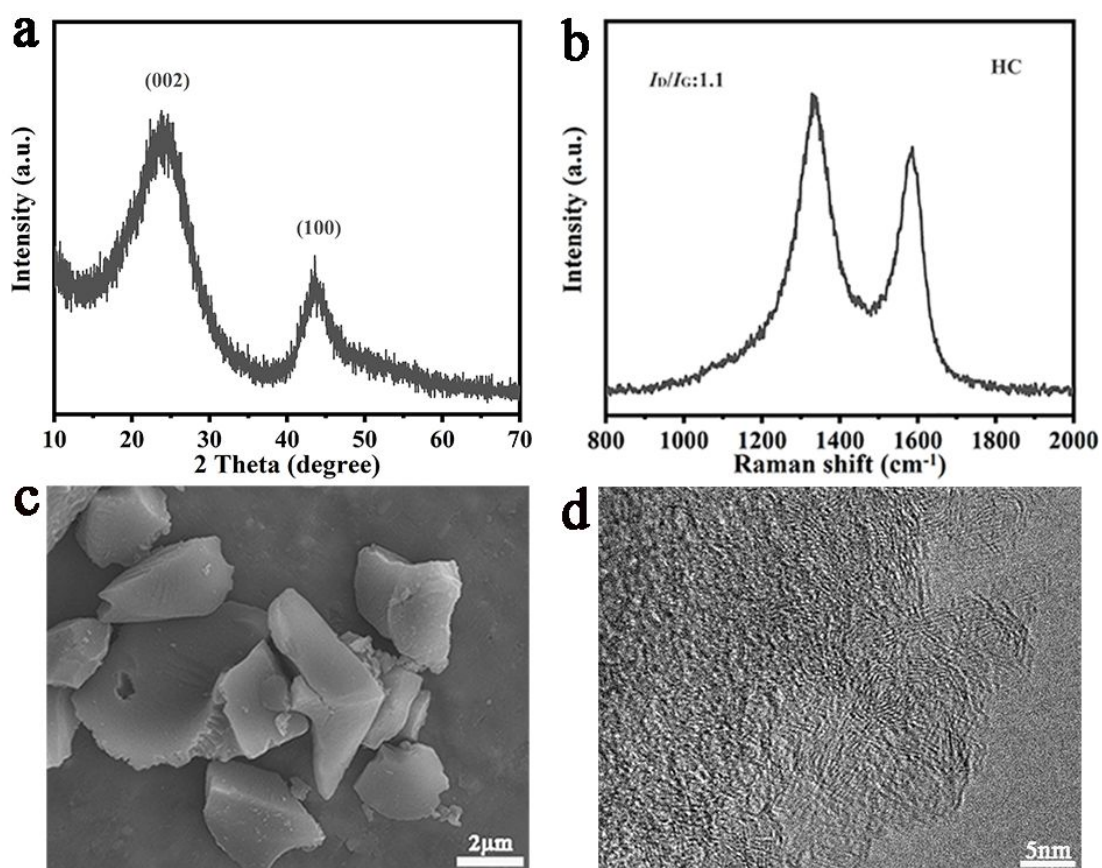

**Figure S9.** (a) XRD pattern of hard carbon; (b) Raman spectra of hard carbon. (c) FESEM pattern of hard carbon; (d) HRTEM image of hard carbon.

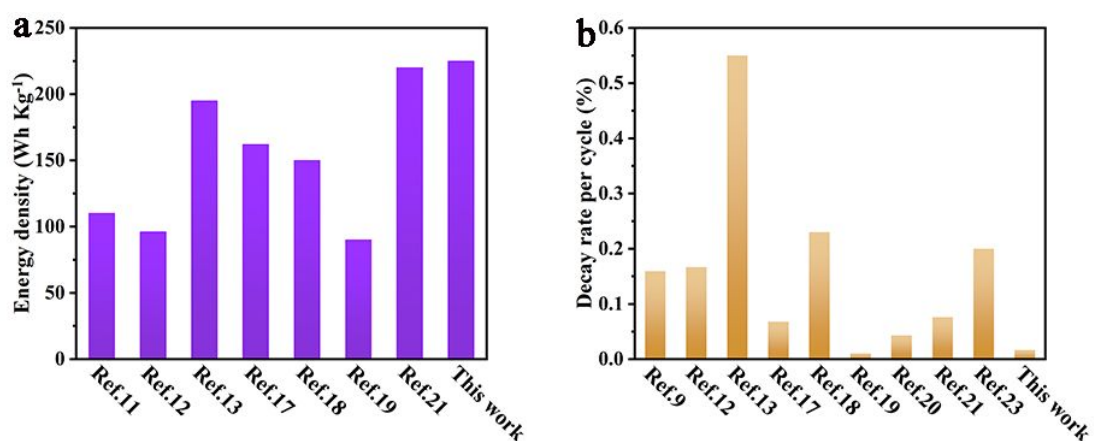

**Figure S10.** Comparisons of full battery energy density (a) and decay rate per cycle (b) with other works.

**Table S1.** Kinetic parameters of NFPO@C and NFPO@SC obtained from equivalent circuit fitting.

| Cathode material | Rct ( $\Omega$ ) | Zw ( $\Omega$ ) |
|------------------|------------------|-----------------|
| NFPO@C           | 547              | 887             |
| NFPO@SC          | 488              | 653             |

**Table S2.** The  $D_{Na^+}$  values for the electrochemistry processes of NFPO@C and NFPO@SC

| Cathode material | Diffusion coefficient ( $\text{cm}^2 \text{s}^{-1}$ ) |
|------------------|-------------------------------------------------------|
| NFPO@C           | $2.34 \times 10^{-12}$                                |
| NFPO@SC          | $3.47 \times 10^{-11}$                                |
